# Supplementary material for: Kinetics of C-Reactive Protein and Procalcitonin in the Early Identification of ICU-Acquired Infections in Critically Ill COVID-19 Patients
Source: MDPI journal article supplement (doi:10.3390/jcm12196110), 2023-09-22
Supplement: s1 [file s1]

**Table S1.** Characterization of microbiological cultures (A) and Isolated microorganisms (B) in the analyzed population.

**A**

| <b>Culture</b>          | <b><i>n</i></b> |
|-------------------------|-----------------|
| Lower respiratory tract | 96              |
| Blood                   | 156             |

**B**

| <b>Isolated Microorganisms</b>    | <b><i>n</i> (%)</b> |
|-----------------------------------|---------------------|
| <i>Citrobacter koseri</i>         | 4                   |
| <i>Corynebacterium striatum</i>   | 1                   |
| <i>Enterobacter cloacae</i>       | 1                   |
| <i>Enterococcus faecalis</i>      | 4                   |
| <i>Escherichia coli</i>           | 1                   |
| <i>Klebsiella oxytoca</i>         | 1                   |
| <i>Klebsiella pneumoniae</i>      | 11                  |
| <i>Neisseria meningitidis</i>     | 1                   |
| <i>Proteus mirabilis</i>          | 2                   |
| <i>Providentia stuartii</i>       | 1                   |
| <i>Pseudomonas aeruginosa</i>     | 3                   |
| <i>Serratia marcescens</i>        | 1                   |
| <i>Staphylococcus aureus</i>      | 7                   |
| <i>Staphylococcus epidermidis</i> | 7                   |
| <i>Streptococcus agalactiae</i>   | 1                   |
| <i>Streptococcus constellatus</i> | 1                   |
| <i>Streptococcus pneumoniae</i>   | 4                   |

**Table S2.** Demographic and primary clinical characteristics according to CRP kinetic patterns.

|                                                                       | <b>Pattern A</b>             | <b>Pattern B</b>               | <b>Pattern C</b>               | <b>Pattern D</b>             | <i>p</i> |
|-----------------------------------------------------------------------|------------------------------|--------------------------------|--------------------------------|------------------------------|----------|
|                                                                       | <b>(<i>n</i> = 3 (8.5%))</b> | <b>(<i>n</i> = 19 (54.3%))</b> | <b>(<i>n</i> = 12 (34.3%))</b> | <b>(<i>n</i> = 1 (2.9%))</b> |          |
| Age, years (mean $\pm$ sd)                                            | 68.3 $\pm$ 8.4               | 64.5 $\pm$ 10.4                | 61.1 $\pm$ 8.1                 | 67                           | 0.602    |
| Gender, males ( <i>n</i> (%))                                         | 2 (66.7)                     | 13 (68.4)                      | 10 (83.3)                      | 1 (100)                      | 0.731    |
| SOFA at admission (median (IQR))                                      | 3 (2.3;3.3)                  | 5 (3.5; 8)                     | 8 (4.3; 12.5)                  | 1                            | 0.061    |
| SAPS III at admission (mean $\pm$ sd)                                 | 42.3 $\pm$ 7.5               | 40.6 $\pm$ 13.9                | 44.1 $\pm$ 13.8                | 25                           | 0.419    |
| Mechanical Ventilation ( <i>n</i> (%))                                | 3 (100)                      | 18 (94.7)                      | 12 (100)                       | 1 (100)                      | 0.833    |
| Length of mechanical ventilation, days (mean $\pm$ sd)                | 28.7 $\pm$ 13.3              | 21.6 $\pm$ 9.9                 | 24.5 $\pm$ 8.7                 | 9                            | 0.467    |
| Minimum paO <sub>2</sub> /FiO <sub>2</sub> registered (mean $\pm$ sd) | 72.8 $\pm$ 10.6              | 93.9 $\pm$ 20.6                | 91 $\pm$ 26.1                  | 112                          | 0.676    |
| Vasopressor Support ( <i>n</i> (%))                                   | 3 (100)                      | 19 (100)                       | 10 (83.3)                      | 1 (100)                      | 0.003    |
| Renal support therapy ( <i>n</i> (%))                                 | 2 (66.6)                     | 9 (47.4)                       | 5 (41.7)                       | 5 (100)                      | 0.689    |
| Maximum CRP registered, mg/dL (mean $\pm$ sd)*                        | 29.4 $\pm$ 1.8               | 34.9 $\pm$ 7.3                 | 32.5 $\pm$ 13.2                | 8.24                         | 0.112    |
| Maximum PCT registered, ng/mL (median (IQR))*                         | 8.8 (3.5; -)                 | 8.4 (2.9; 12.9)                | 1.2 (0.4; 8.7)                 | 0.27                         | 0.089    |
| ICU length of stay, days (median (IQR))                               | 32 $\pm$ 16.8                | 27.7 $\pm$ 11.9                | 28.1 $\pm$ 12.7                | 13                           | 0.612    |
| In-Hospital Length of stay, days (median (IQR))                       | 48.3 $\pm$ 29.2              | 46.3 $\pm$ 29                  | 44.8 $\pm$ 29.3                | 28                           | 0.820    |
| In-Hospital mortality rate ( <i>n</i> (%))                            | 1 (33.3%)                    | 7 (36.8)                       | 2 (16.7)                       | 0 (0)                        | 0.593    |

IQR denotes Interquartile range; SOFA denotes Sequential Organ Failure Assessment; SAPS denotes Simplified Acute Physiology Score; CRP denotes C-Reactive Protein; PCT denotes Procalcitonin.

\*Registered before Day 0
